# Supplementary material for: JunB promotes cell invasion, migration and distant metastasis of head and neck squamous cell carcinoma
Source: PubMed Central journal article supplement (PMC4709939; doi:10.1186/s13046-016-0284-4), 2016-01-12

**A**

KCC-T871

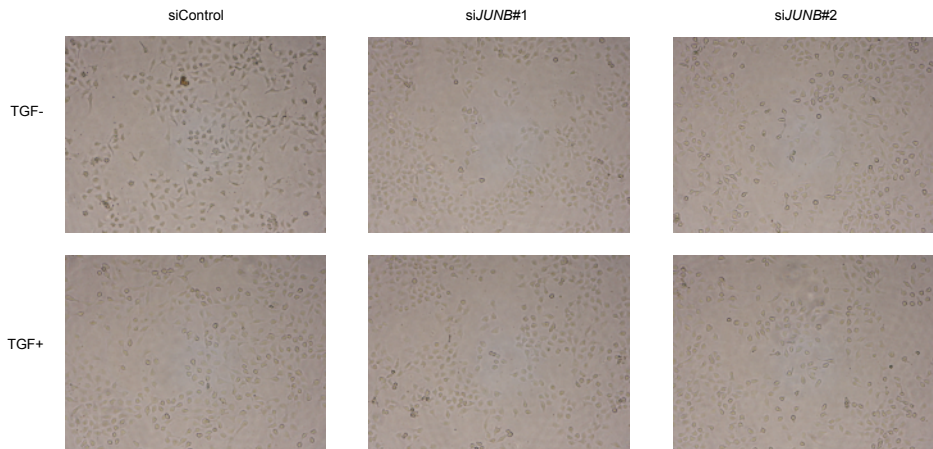**B**

HN30

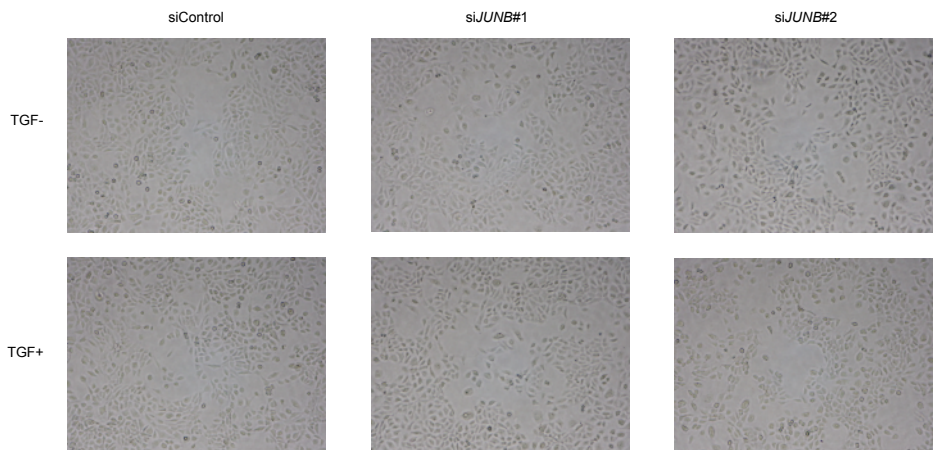**C**

KCC-T871

HN30

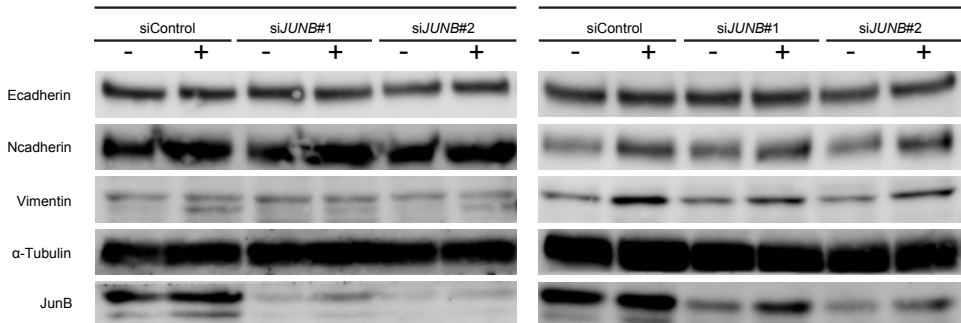

Supplement: 13046_2016_284_MOESM5_ESM.pdf [file 13046_2016_284_MOESM5_ESM.pdf]
